# Supplementary material for: The semiquinone swing in the bifurcating electron transferring flavoprotein/butyryl-CoA dehydrogenase complex from Clostridium difficile
Source: PubMed Central journal article supplement (PMC5691135; doi:10.1038/s41467-017-01746-3), 2017-11-17
Supplement: 41467_2017_1746_MOESM1_ESM.pdf [file 41467_2017_1746_MOESM1_ESM.pdf]

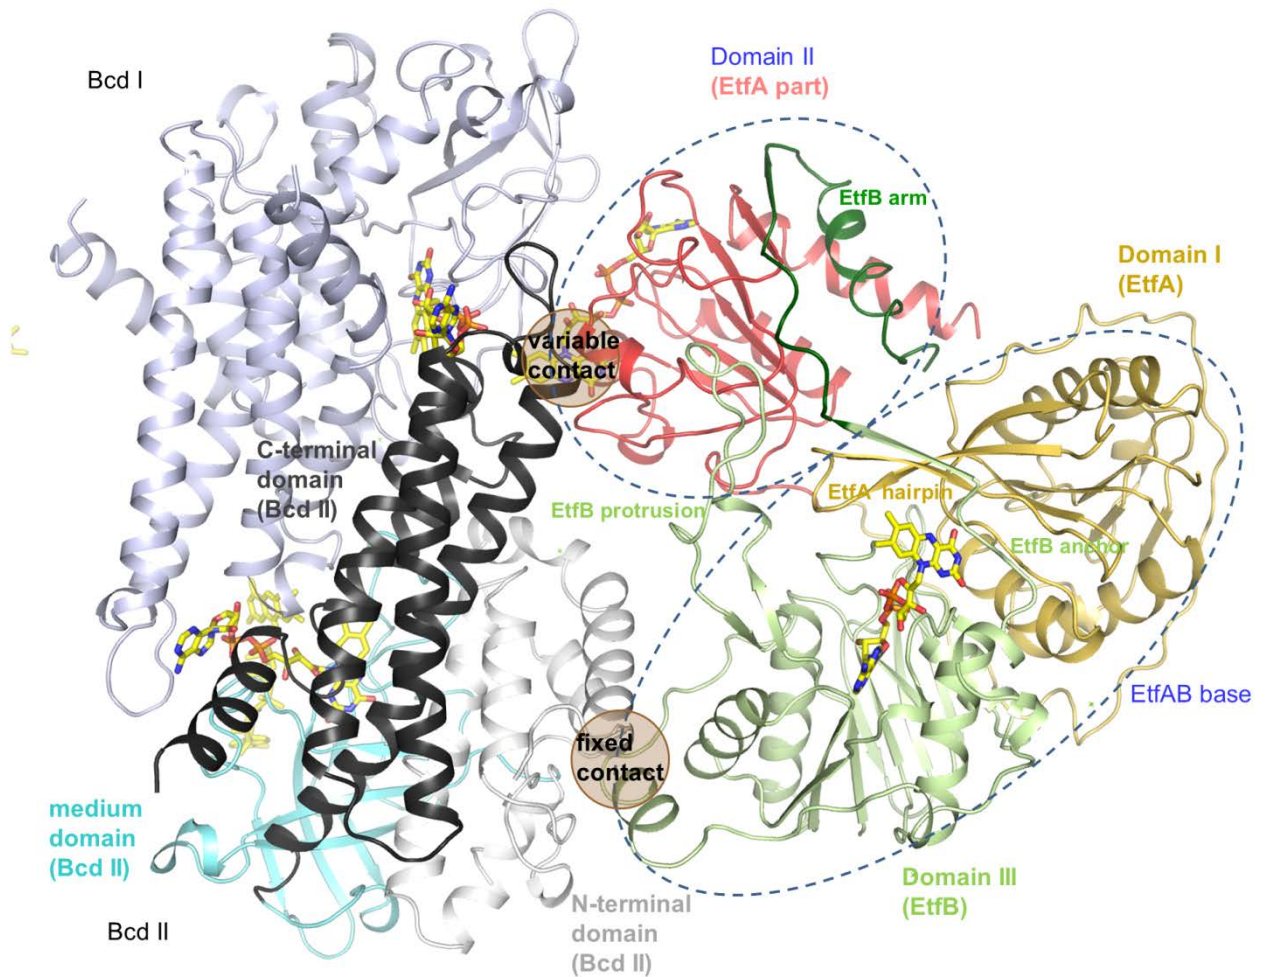

**Supplementary Fig. 1** EtfAB/Bcd structure in the D state. One catalytic unit of the  $(\text{EtfAB/Bcd})_4$  complex consists of EtfAB, Bcd1 (light blue), and Bcd2 ( N-terminal domain: light gray, medium domain in marine and C-terminal domain in dark gray). EtfAB consists of domain I (yellow) and domain III (light-green) forming the EtfAB base (marked by the larger blue circle), and domain II composed of the C-terminal part of EtfA (salmon) and the EtfB arm (dark green) (marked by the smaller blue circle).

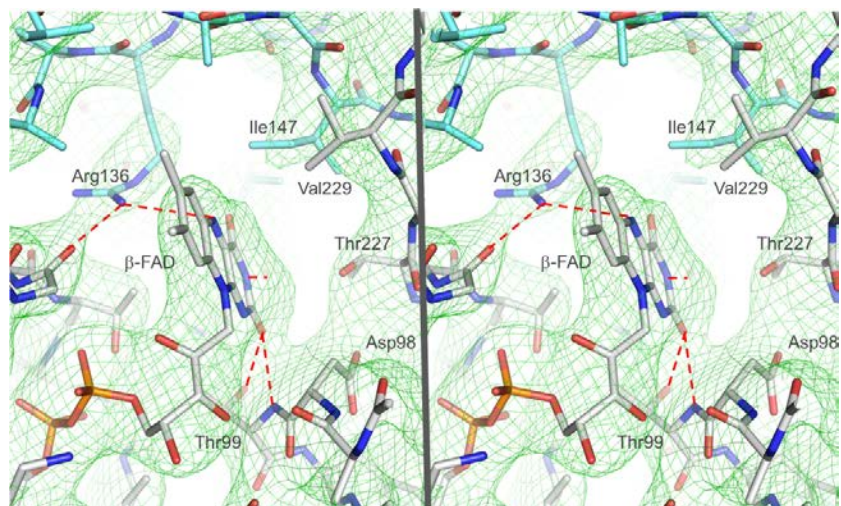

**Supplementary Fig. 2** The electron bifurcating  $\beta$ -FAD and its surrounding. The  $2F_o - F_c$  electron density (green) is contoured at  $1\sigma$ . The carbons of subunits  $\alpha$  and  $\beta$  are drawn in lightcyan and gray.

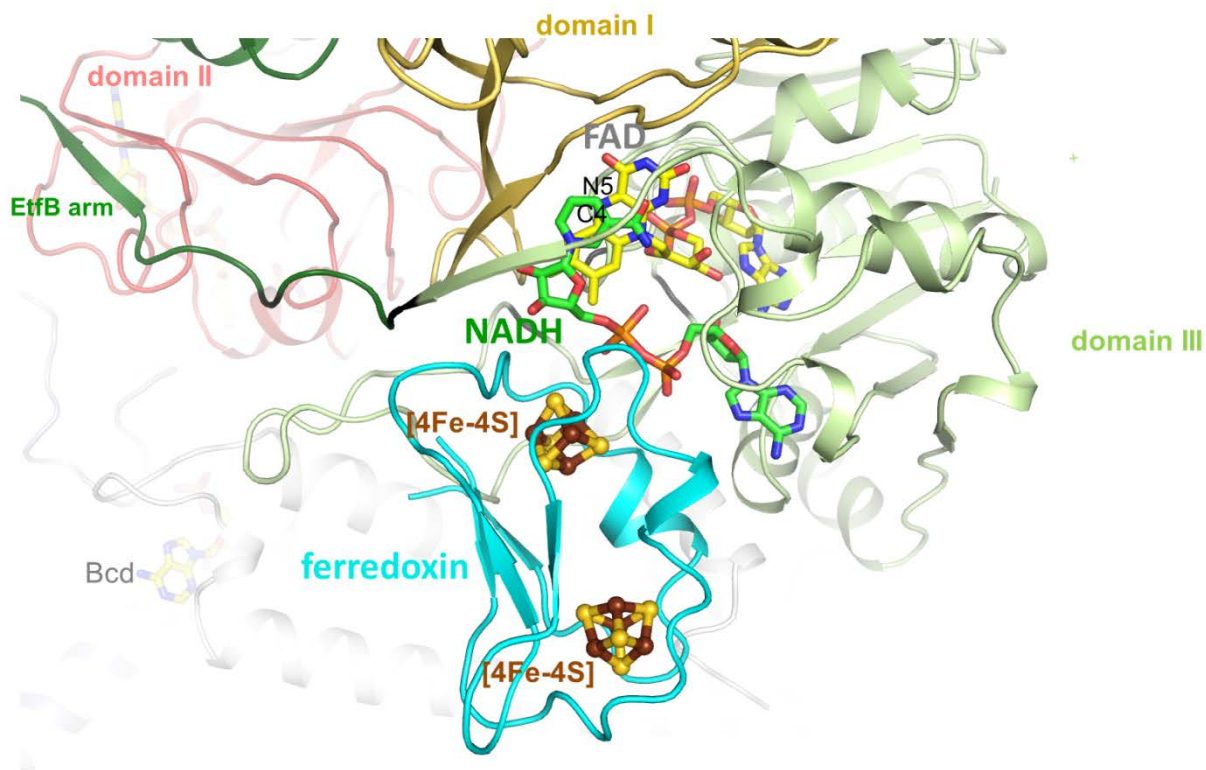

**Supplementary Fig. 3 NADH and ferredoxin binding site.** In the EtfAB-NADH complex structure of *A. fermentans* the ADP moiety was visible in the electron density. The ribose-nicotinamide moiety was modelled in a manner to position the N5 of FAD and C4 of NADH in van der Waals contact to each other. The ferredoxin was modeled to minimize the distance to  $\beta$ -FAD of EtfAB and the [4Fe-4S] cluster of ferredoxin without causing severe clashes between the polypeptide chains.

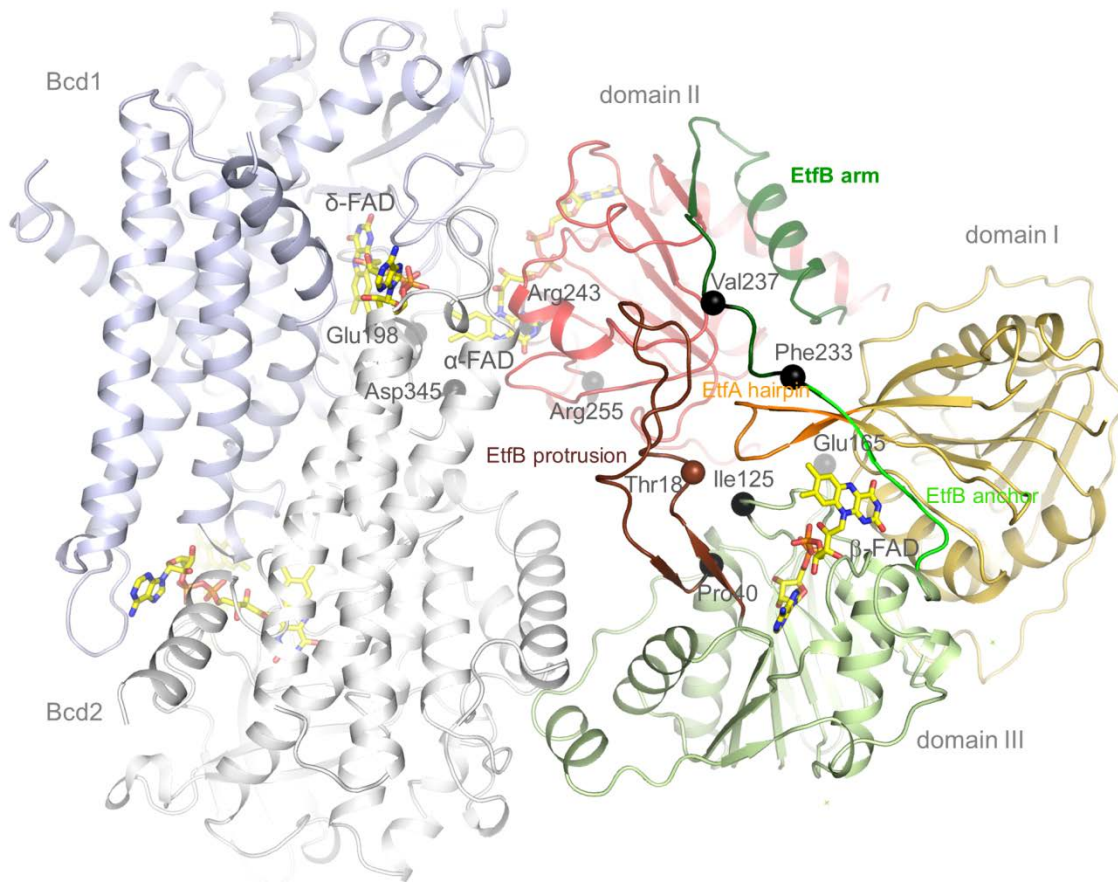

**Supplementary Fig. 4** Location of the mutated residues in the EtfAB/Bcd complex. The  $C\alpha$  atoms of the mutated residues were marked as spheres.

**Supplementary Table 1** Specific activities of the EtfAB/Bcd variants

| Assay            | Bifurcation                                                                               | Bcd /Fc <sup>3+</sup> | NADH Oxidase | Remarks                                                                                |
|------------------|-------------------------------------------------------------------------------------------|-----------------------|--------------|----------------------------------------------------------------------------------------|
| <b>Variant</b>   | Specific activity ( $\mu\text{mol} \times \text{min}^{-1} \times \text{mg}^{-1}$ protein) |                       |              |                                                                                        |
| <b>Wild type</b> | 0.214                                                                                     | 1.27                  | 0.357        |                                                                                        |
| Bcd E198Q        | 0.016                                                                                     | 0.094                 | 0.0259       | conserved, interacts with EtfA R243 in the D-state                                     |
| Bcd E198A        | 0.054                                                                                     | 0.064                 | 0.0189       |                                                                                        |
| EtfA R243Q       | 0.011                                                                                     | 0.027                 | 0.0125       | conserved, interacts with Bcd2 E198 in the D-state                                     |
| Bcd D345N        | 0.0672                                                                                    | 0.84                  | 0.088        | conserved, interacts with EtfA R243 in the D-state                                     |
| Bcd D345A        | 0.130                                                                                     | 0.95                  | 0.190        |                                                                                        |
| EtfB E165A       | 0.035                                                                                     | 0.48                  | 0.10         | conserved, influences domain II rotation*                                              |
| EtfB E165D       | 0.0396                                                                                    | 0.315                 | 0.041        |                                                                                        |
| EtfA R255Q       | <b>0.543</b>                                                                              | <b>1.75</b>           | <b>1.24</b>  | not conserved, influences the EtfA linker                                              |
| EtfA R255A       | <b>0.249</b>                                                                              | <b>1.36</b>           | <b>0.629</b> | not conserved, influences the EtfA linker                                              |
| EtfB T18E        | 0.0803                                                                                    | <b>3.13</b>           | <b>0.899</b> | conserved in bifurcating EtfS, in protrusion                                           |
| EtfB P40L        | 0.004                                                                                     | 0.003                 | 0.183        | conserved in almost all EtfS, in protrusion                                            |
| EtfB I125D       | 0.002                                                                                     | 0.004                 | 0.255        | conserved, influences domain II rotation                                               |
| EtfB I125F       | 0.007                                                                                     | 0.24                  | 0.0413       | conserved, influences domain II rotation                                               |
| EtfB F233A       | <b>0.589</b>                                                                              | <b>3.55</b>           | <b>1.80</b>  | conserved in bifurcating EtfS, H in <i>C. kluyveri</i> , in the anchor of the EtfB arm |
| EtfB V237N       | 0.0403                                                                                    | 0.75                  | <b>0.72</b>  | not conserved, in the EtfB linker                                                      |

The kinetic characterization of the enzyme variants resulted in partly surprising results reflecting the complexity of the electron bifurcation process involving large-scale conformational changes which is influenced by many residues over a wide region. This might be the reason why almost each enzyme variant exhibits a strong modification of the kinetic parameters compared to that of the wild type. Even specific activities significantly higher (in boldface) than that of the wild type are found and rationalized by postulating an accelerated

rotation of domain II. Whereas the kinetic parameters of electron bifurcation can be plausibly interpreted, the influence of some mutations on the specific activity of NADH oxidation and butyryl-CoA reduction, which proceed in localized active sites remain elusive. The EtfB E165A mutant crystallized much faster than the wild type, probably due to inhibition of domain II rotation. Unfortunately, the crystals did not diffract properly.

**Supplementary Table 2** Primers used for cloning of *etfAB-bcd* and the generation of mutants.

### Cloning of *etfAB-bcd*

*bcd* forward: AAGCTCTTCAATGGATTTAAATTCTAAAAAATATCAGATGCT

*etfA* reverse: TGT GCTCTTCTCCCGTTAGCTAAAACCTTCACCTTTTTCTTTTGC

### Generation of mutants

|                    | FORWARD                  | REVERSE                     |
|--------------------|--------------------------|-----------------------------|
| Etf $\alpha$ R136Q | ATTATTAATGACACAACCTG     | CAAAGGCAGGTTGTGT            |
| Etf $\alpha$ R136K | ATTATTAATGACAAAACCTG     | CAAAGGCAGGTTTTGT            |
| Etf $\alpha$ R136M | ATTATTAATGACAATGCCTG     | CAAAGGCAGGCATTGT            |
| Etf $\alpha$ R243Q | GTTTCTGGTTCTCAAGCCACTATA | CCTGCATCTATAGTGGCTTGAGAAC   |
| Etf $\alpha$ R255Q | TTAGATAAAGCACACAACAGTT   | GTTTGACCAACTTGTTGTGCTTTA    |
| Etf $\beta$ T18E   | CAAGTTCCAGATACAGAAGAAG   | GGATCTAGTTTAACTTCTTCTGTAT   |
| Etf $\beta$ P40L   | CAAGTATAATAAACCTTGATG    | TGCTTTATCATCAAGGTTT         |
| Etf $\beta$ I124D  | GAAGACAGGCGGATGATG       | CAGTATCTCCATCATCCGC         |
| Etf $\beta$ I124F  | GAAGACAGGCGTTTGATG       | CAGTATCTCCATCAAACGC         |
| Etf $\beta$ E165A  | GTAAAAAGACAATTTGCAGATTGT | TAAGTCATGGCAACAATCTGCAAATTG |
| Etf $\beta$ E165D  | GTAAAAAGACAATTTGACGATTGT | TCATGGCAACAATCGTCAAATTG     |
| Etf $\beta$ F232A  | GTGTATTTAAATCAGCTACAA    | TTAACTGATTTTGTAGCTGAT       |
| Etf $\beta$ V236N  | CATTTACAAAATCAAATAAACC   | CCAGCTGGTTTATTTGATT         |
| BcdE198Q           | TTGGAGTTAAACAAAAG        | CCCATTTTCTTTTGTTTA          |
| BcdE198A           | TTGGAGTTAAAGCAAAG        | CCCATTTTCTTTGCTTTA          |
| BcdD345N           | GATACACTCGTAACTATC       | TTCTACTGGATAGTTACGAG        |
| BcdD345A           | GATACACTCGTGCCTATC       | TTCTACTGGATAGGCACGAG        |
